# Supplementary material
Source: MDPI journal article supplement (https://www.mdpi.com/2077-1312/10/5/709)
Supplement: s1 [file s1]

**Table S1. Primer pairs used for eIF2 $\alpha$ -RACE primer, cloning of cobia eIF2 $\alpha$  and cobia COX1 gene recognition.**

| Primer                  | Sequence (5'-3')                              | Tm   |
|-------------------------|-----------------------------------------------|------|
| RceIF2 $\alpha$ 5'GSP1  | CACACTTGATGGCCTCCTCT                          | 56.9 |
| RceIF2 $\alpha$ 5'NGSP1 | TACTCGGATGACGACCACGC                          | 59.1 |
| RceIF2 $\alpha$ 3'GSP2  | GGGTCTGTCTGTCCTCAACC                          | 57.3 |
| RceIF2 $\alpha$ 3'NGSP  | AGAGGCTAGAGCGGGAGAAC                          | 58.4 |
| RceIF2 $\alpha$ F1      | GAGGTGGAGGATGTGGTGAT                          | 56.4 |
| RceIF2 $\alpha$ F2      | GAGTACAACAACATCGAGGG                          | 52.9 |
| RceIF2 $\alpha$ R1      | YTCDGCTTTGGCCTCCAT                            | 55.7 |
| RceIF2 $\alpha$ R2      | TGACVGCCTGTGGDGTSAG                           | 59.7 |
| RcBaF                   | GATCCTGACAGAGCGTGG                            | 55.3 |
| RcBaR                   | AGCACAGTGTTGGCGTACAG                          | 57.9 |
| RcFISHCOILBC_ts         | CACGACGTTGTAAAACGACTCAACYAATCAYAAAGATATYGGCAC | 64.3 |
| RcFISHCOIHBC_ts         | GGATAACAATTTACACAGGACTTCYGGGTGRCCRAARAATCA    | 65.9 |
| RcCOX1F                 | TCAACCAACCACAAAGACATTGGCAC                    | 60.2 |
| RcCOX1R                 | TAGACTTCTGGGTGGCCAAAGAATCA                    | 59.8 |

Primers used to amplify the cobia eIF2 $\alpha$  cDNAs were designed from the published coding sequences from five close related fish species, zebra fish (NM\_131800.2), catfish (GU588091.1), puffer fish (CR685632.2), Atlantic salmon (NM\_001140183) and rainbow trout (NM\_001124296.1), selected most conserved sequence as target region and we initially amplified a ~900 bp cDNA. The complete coding sequence was assembled by 5' & 3' RACE. The degenerate primers among the above oligonucleotides incorporate a statistical mix of monomers at the positions labeled V (A, C or G), S (C or G), R (A or G), Y (C or T) or D (A, G or T) [in accordance with IUPAC convention].

**Table S2. Dietary formulations for the fish meal versus plant protein diets.**

| <b>Ingredient (g kg<sup>-1</sup>)</b>                                            | <b>FM (Diet 6)</b> | <b>PP (Diet 1)</b>                                                  |
|----------------------------------------------------------------------------------|--------------------|---------------------------------------------------------------------|
| Menhaden fish meal                                                               | 345                | 0                                                                   |
| Soy Protein concentrate                                                          | 0                  | 269                                                                 |
| Corn Protein concentrate                                                         | 44.3               | 193.4                                                               |
| Poultry by-product meal                                                          | 118                | 0                                                                   |
| Wheat Flour                                                                      | 237.7              | 175.5                                                               |
| Soybean meal, solvent extracted                                                  | 90                 | 90                                                                  |
| Wheat Gluten meal                                                                | 0                  | 22                                                                  |
| Blood meal, spray                                                                | 39                 | 0                                                                   |
| Menhaden fish oil                                                                | 90                 | 120                                                                 |
| Vitamin pre-mix                                                                  | 20                 | 20                                                                  |
| Mono-Dical Phosphate                                                             | 0                  | 42.5                                                                |
| Lecithin                                                                         | 0                  | 20                                                                  |
| L-Lysine                                                                         | 0                  | 19.9                                                                |
| Choline CL                                                                       | 6                  | 6                                                                   |
| Potassium Chloride                                                               | 0                  | 5.6                                                                 |
| DL-methionine                                                                    | 0                  | 5                                                                   |
| Threonine                                                                        | 0                  | 2.8                                                                 |
| Sodium Chloride                                                                  | 0                  | 2.8                                                                 |
| Stay-C                                                                           | 2                  | 2                                                                   |
| Trace mineral pre-mix                                                            | 1                  | 1                                                                   |
| Magnesium Oxid                                                                   | 0                  | 0.5                                                                 |
| Mycozorb                                                                         | 2                  | 2                                                                   |
| Taurine                                                                          | 0                  | 0.02                                                                |
| <b>Performance characteristics</b> (extrapolated from two different experiments) |                    |                                                                     |
| SGR                                                                              | 4.72+/-0.02        | *Either 0.57+/-0.12 (if 8.8 g start)<br>or 2.54+/- (if 128 g start) |

**Table S3. Diet formulations and proximate compositions of reference and experimental diets.**

| <b>Ingredient (g 100g<sup>-1</sup>)</b>                        | <b>Reference diet</b> | <b>3010-50</b> |
|----------------------------------------------------------------|-----------------------|----------------|
| Menhaden meal                                                  | 45.5                  | 22.9           |
| Poultry meal                                                   | 7.5                   | 3.8            |
| Wheat Flour                                                    | 16                    | 15.0           |
| Soy protein concentrate                                        | 7.5                   | 3.8            |
| NPFI-3010                                                      | --                    | 35.1*          |
| Corn                                                           | 17                    | 9.4            |
| Menhaden oil                                                   | 3.9                   | 6.4*           |
| Vitamin pre-mix                                                | 1.0                   | 1.0            |
| Trace mineral pre-mix                                          | 0.1                   | 0.1            |
| Taurine                                                        | 1.5                   | 1.5            |
| Lysine HCL                                                     | --                    | 0.1*           |
| DL-Methionine                                                  | --                    | 0.8*           |
| <b>Proximate Composition (g 100g<sup>-1</sup>)<sup>a</sup></b> |                       |                |
| Moisture (g 100g <sup>-1</sup> )                               | 7.2                   | 11.1           |
| Protein (g 100g <sup>-1</sup> dm)                              | 46.3                  | 42.6           |
| Protein on dry matter basis                                    | 49.9                  | 47.9           |
| Fat (g 100g <sup>-1</sup> dm)                                  | 10.8                  | 11.4           |
| Fiber (g 100g <sup>-1</sup> dm)                                | 1.2                   | 1.0            |
| Ash (g 100g <sup>-1</sup> dm)                                  | 9.1                   | 8.8            |
| Carbohydrate <sup>b</sup> (g 100g <sup>-1</sup> dm)            | 28.72                 | 29.01          |
| Energy (mJ kg <sup>-1</sup> )                                  | 18.56                 | 18.97          |
| <b>Performance characteristics</b>                             |                       |                |
| SGR                                                            | 3.29+/-0.08           | 3.45+/-0.08    |
| PER                                                            | 1.74+/-0.04           | 1.74+/-0.04    |
| CF                                                             | 0.637+/-0.04          | 0.715+/-0.04   |

<sup>a</sup> New Jersey Feeds Labs analysis, Trenton, NJ.

<sup>b</sup> Calculated by difference (100-Moisture-Protein-Ash-Fat-Fiber).

3010-50 formulated to replace 50 % protein from fish meal with NPF1-3010. Diets ~identical in levels of protein, fat, fiber, carbohydrate, taurine. \* higher in 3010-50
